# Supplementary material
Source: PubMed Central journal article supplement (PMC5622867)
Supplement: 2017_168583-Disclosures_and_Contributions.pdf [file 2017_168583-Disclosures_and_Contributions.pdf]

Haematologica  
HAEMATOL/2017/168583  
Version 4

Feasibility study of online-streamed yoga for symptom management in  
patients with myeloproliferative neoplasms

Jennifer Huberty, Ryan Eckert, Krisstina Gowin, Jules Mitchell, Amylou  
C. Dueck, Brenda F. Ginos, Linda Larkey, and Ruben Mesa

Disclosures: This study was generously supported by philanthropic funds donated to the Mayo Clinic for MPN Research. The authors report no conflicts of interest.

Contributions: Jennifer Huberty: study concept and design, manuscript preparation and manuscript editing/revising; Ryan Eckert: data collection, manuscript preparation and manuscript editing/revising; Krisstina Gowin: study concept and design, manuscript editing/revising; Jules Mitchell: study concept and design, manuscript editing/revising; Amylou Dueck; statistical analyses, manuscript editing/revising; Brenda Ginos: statistical analyses; Linda Larkey: manuscript editing/revising; Ruben Mesa: study concept and design; manuscript editing/revising.
